# Supplementary material
Source: publisher figshare collection journal article supplement (https://acs.figshare.com/ndownloader/files/3770749)
Supplement: Supplementary file 1 [file 3770749]

## Indole Glucocorticoid Receptor Antagonists Active in a Model of Dyslipidemia Act via a Unique Association with an Agonist Binding Site.

John Gately Luz<sup>‡</sup>, Matthew W. Carson<sup>‡</sup>, Bradley Condon<sup>‡</sup>, David Clawson<sup>‡</sup>, Anna Pustilnik<sup>‡</sup>, Daniel T. Kohlman<sup>‡</sup>, Robert J. Barr<sup>‡</sup>, James S. Bean<sup>‡</sup>, M. Joelle Dill<sup>‡</sup>, Dana K Sindelar<sup>‡</sup>, Milan Maletic<sup>‡</sup>, Michael J. Coghlan<sup>\*‡</sup>

<sup>‡</sup>. Lilly Research Laboratories, A Division of Eli Lilly & Co., Lilly Corporate Center, Indianapolis, IN, 46285 USA.

<sup>‡</sup>. Eli Lilly Biotechnology Center, 10300 Campus Point Drive, Suite 200, San Diego, CA, 92121 USA.

### Supplemental Information

|           | (% efficacy @ 10 $\mu$ M) |                 |
|-----------|---------------------------|-----------------|
|           | GR Agonism                | Transrepression |
| <b>8</b>  | 5.80 (2.22, n=5)          | -               |
| <b>15</b> | 3.65(0.428)2              | -               |
| <b>16</b> | 16.9                      | -               |
| <b>18</b> | 15.7                      | -               |
| <b>19</b> | 7.55 (1.14)2              | 14.3 (9.49)2    |
| <b>21</b> | 7.34                      | -7.00 (18.4)2   |
| <b>22</b> | 8.70 (1.66)2              | 87.0 (0.856)2   |
| MIF       | 17.7 (1.71)7              | 19.4 (20.0)7    |

**Table S1: Agonist and Transrepression data for selected GR ligands:** Compounds with GR binding  $K_i < 10$  nM were assayed in models of agonism (agonist activity in HEK293 cells transiently transfected with GREs controlling a luciferase (*luc*) reporter gene) and transrepression (Inhibition of IL-1 $\beta$  - induced IL-6 in CCD-39SK cells).<sup>1</sup> Both methods employed prednisolone at 10 $\mu$ M to define maximal efficacy (100%). In all but one case the compounds showed minimal functional efficacy as agonists or transrepressors at the highest concentration tested (10 $\mu$ M) and none had activity at lower concentrations.

- No activity at 10 $\mu$ M

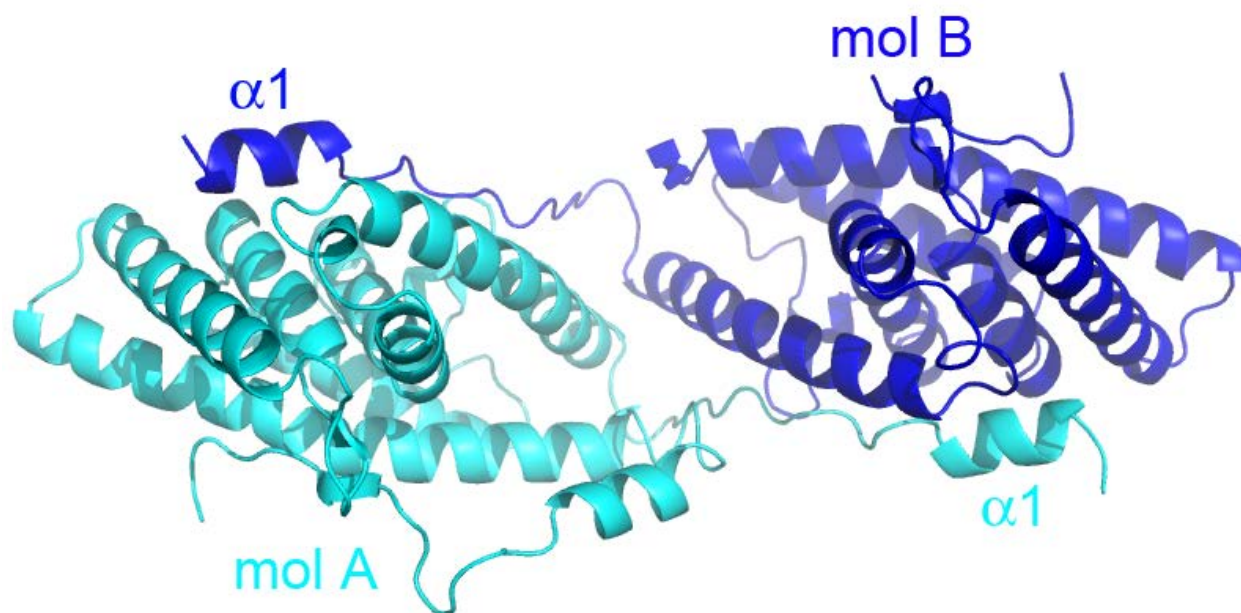

**Supplemental Figure 1. Domain swapping through the  $\alpha$ -1 helix in the asymmetric unit of the GR-LBD/Compound 8/NcoR crystal structure.** GR-LBD is represented as a ribbon diagram with molecule A colored cyan and molecule B colored blue. The  $\alpha$ -1 helix of molecule A extends to the right and interacts with molecule B. The  $\alpha$ -1 helix of molecule B extends to the left and interacts with molecule A.

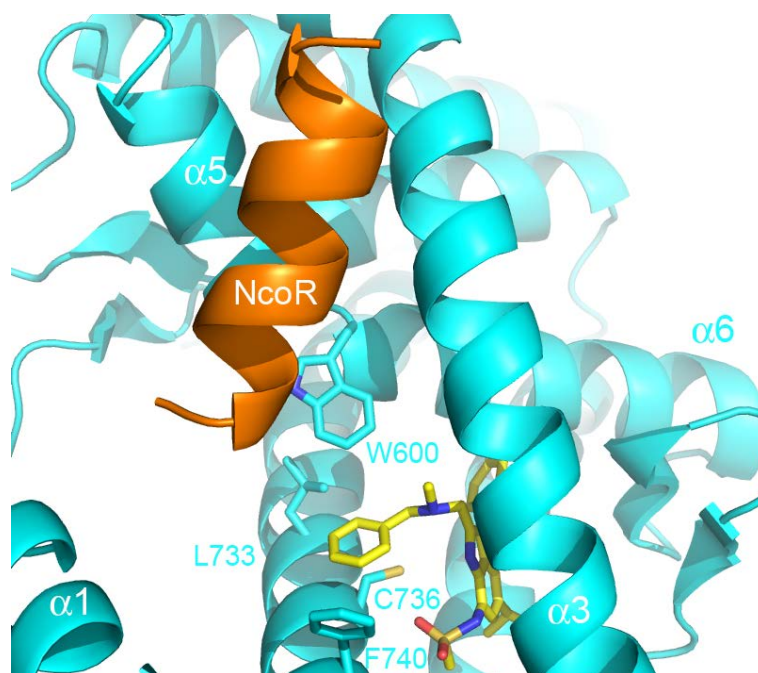

**Supplemental Figure 2. Orientation of the NcoR corepressor peptide and the benzylamine moiety of compound 8.** The GR-LBD (cyan) and NcoR (orange) are depicted as ribbons. compound **8** is represented as sticks and colored by atom (as previous) GR-LBD side chains that form Van der Waals interaction with the compound **8** phenyl are represented by sticks colored by atom (as previous). The NcoR peptide is bound in a groove formed from the  $\alpha$ -3 and  $\alpha$ -5 helices. The compound **8** phenyl is flanked by side chains extending from the  $\alpha$ -11 helix and the tryptophan side chain extending from the first turn of the  $\alpha$ -6 helix.

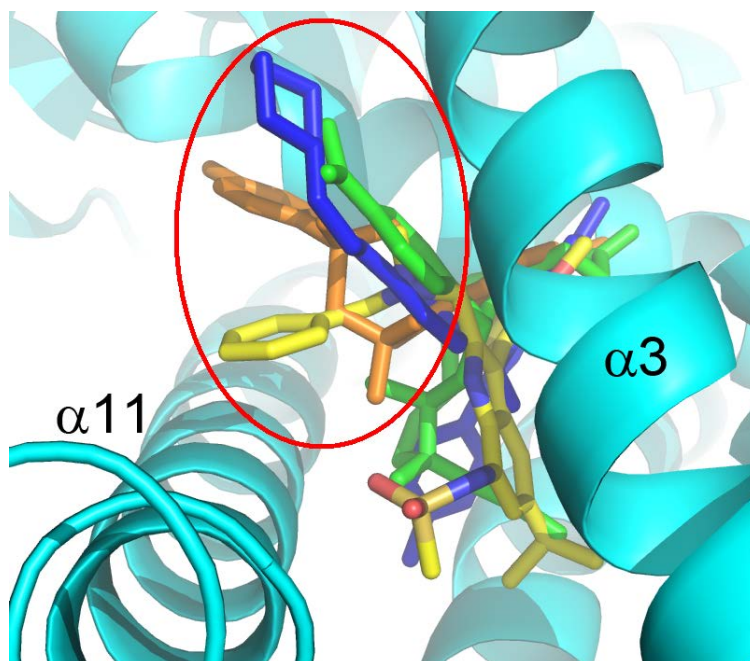

**Supplemental Figure 3. Relative orientation of antagonists bound to steroid NHRs.** The GR-LBD/ **8**, GR-LBD/MIF, ER/raloxifene, and AR/bicalutamide structures were superimposed. The NHR-LBD is represented by ribbons (cyan). Compound **8** (yellow), MIF (green), raloxifene (blue), and bicalutamide (orange) are represented by sticks. The red oval highlights differences of the benzyl group of compound **8** versus the 'blocking groups' of other NHR antagonists resulting in the antagonist conformation of the h12 helix and a closer association of **8** with  $\alpha$  helix 11.

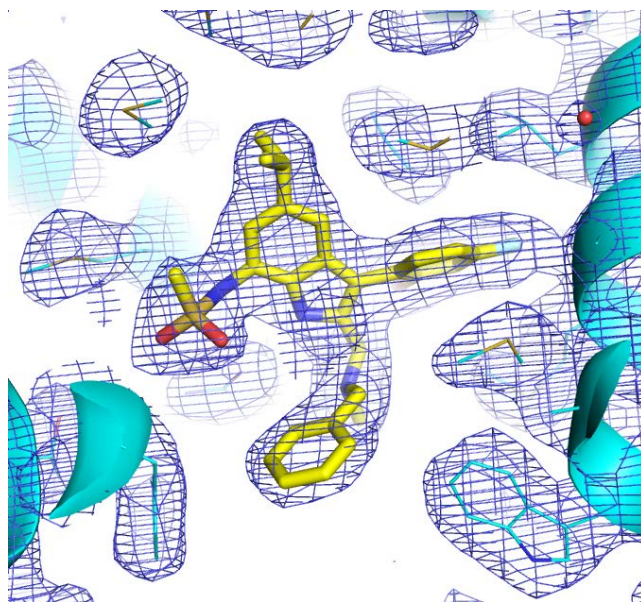

**Supplemental Figure 4. Electron density of ligand binding site contoured at 1.0  $\sigma$**  The GR-LBD (cyan ribbons and side chains as lines colored by atom as previous) and compound **8** (sticks colored by atom as previous) are shown. The 2Fo-Fc electron density map, shown as mesh and contoured at 1.0  $\sigma$  demonstrates that the entirety of the ligand is represented by unambiguous electron density.

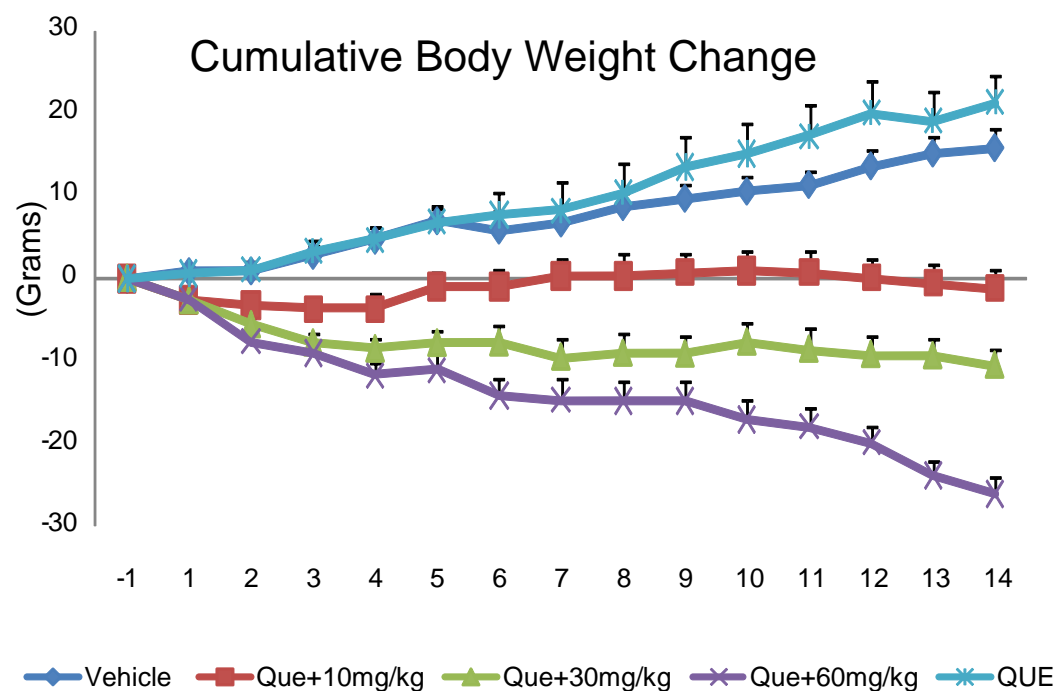

**Supplemental Figure 5a: Time course of weight gain in female Wistar rats dosed qd with quetiapine (10 mg) and varied doses of compound 8 po.**

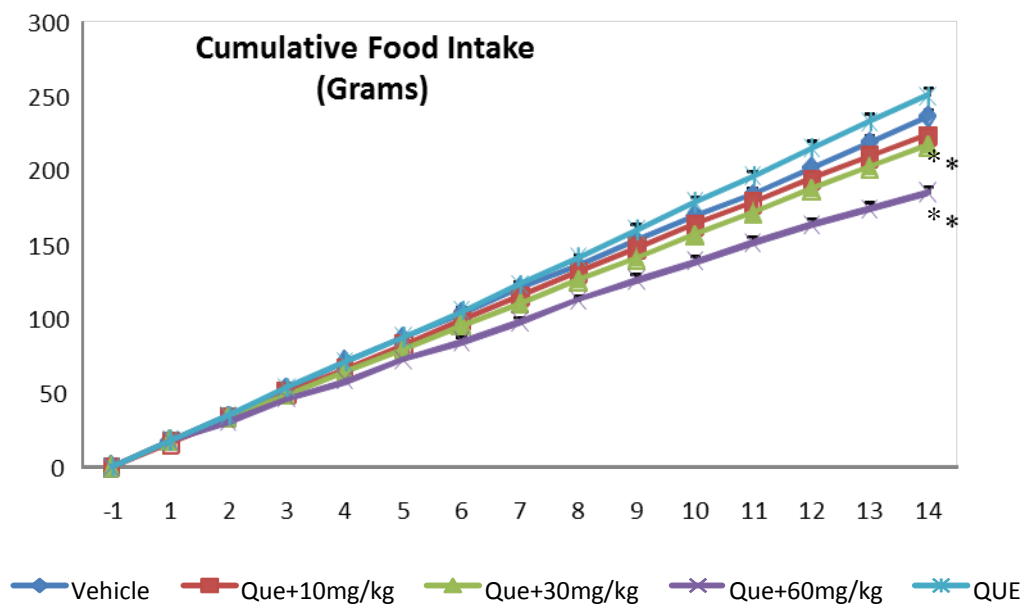

**Supplemental Figure 5b: Food consumption during the 14d concurrent dosing of quetiapine and compound 8:**



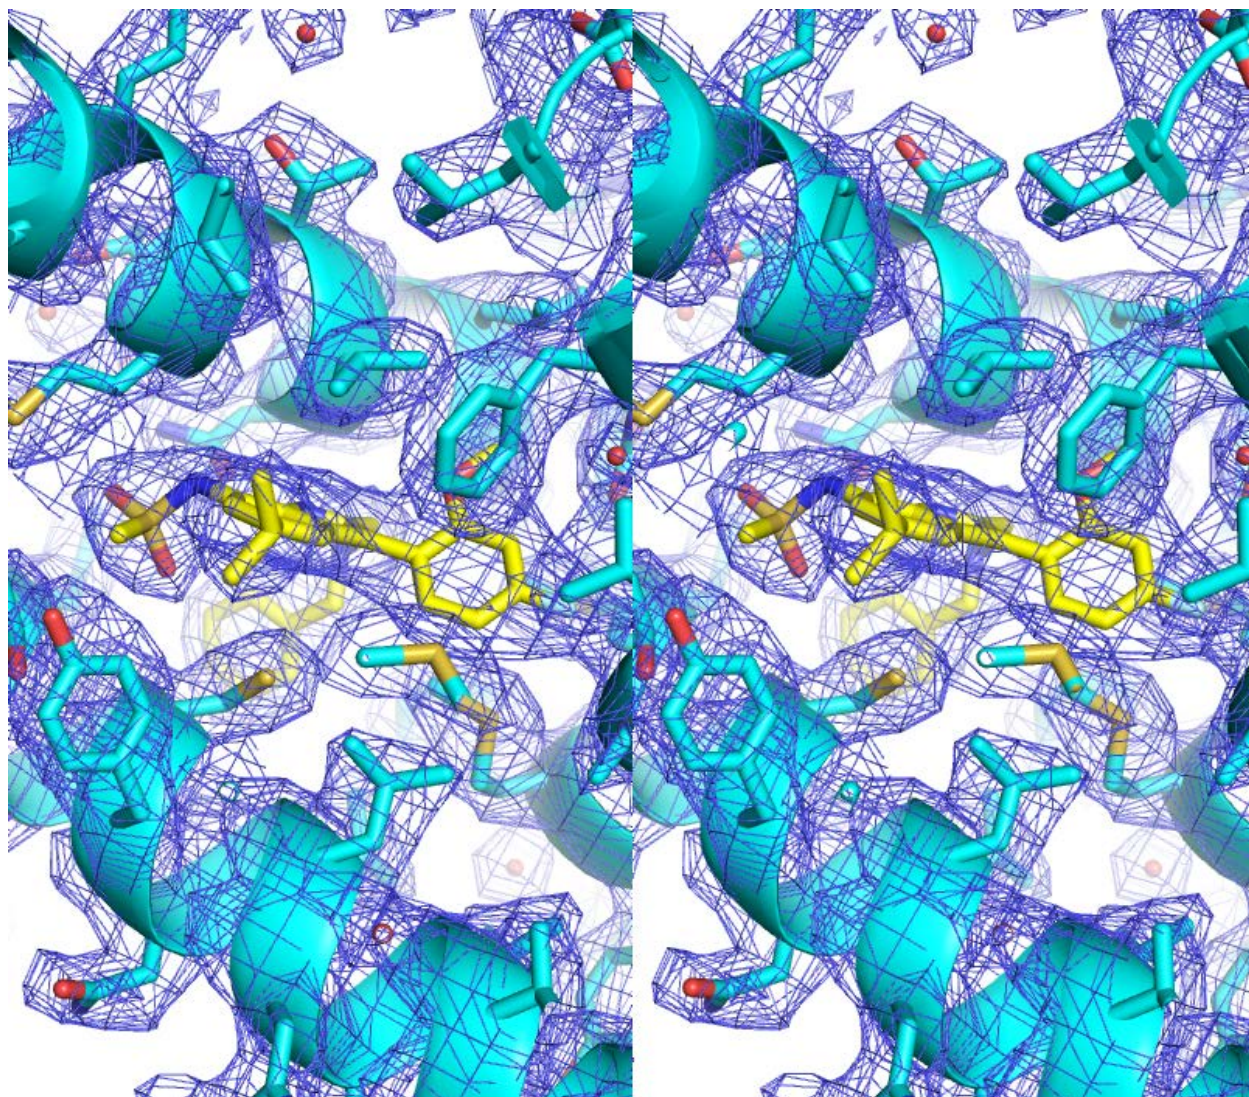

Stereo image of 2Fo-Fc electron density map contoured at 1.0  $\sigma$  for quality check.

1. Carson, M. W.; Luz, J. G.; Suen, C.; Montrose, C.; Zink, R.; Ruan, X.; Cheng, C.; Cole, H.; Adrian, M. D.; Kohlman, D. T.; Mabry, T.; Snyder, N.; Condon, B.; Maletic, M.; Clawson, D.; Pustilnik, A.; Coghlan, M. J. Glucocorticoid Receptor Modulators Informed by Crystallography Lead to a New Rationale for Receptor Selectivity, Function and Implications for Structure-based Design. *J Med Chem* **2014**, 57, 849-860.
